# Supplementary material for: Functional Identification and Evolutionary Analysis of Two Novel Plasmids Mediating Quinolone Resistance in Proteus vulgaris
Source: MDPI journal article supplement (doi:10.3390/microorganisms8071074), 2020-07-18
Supplement: s1 [file s1]

**Table S2.** *qnrD*-carrying plasmids isolated from different strains.

| Plasmids <sup>a</sup> | Sizes (bp) | Strains                                                                                     | Sources <sup>b</sup>  | Accession numbers |
|-----------------------|------------|---------------------------------------------------------------------------------------------|-----------------------|-------------------|
| pBT169                | 2683       | <i>Providencia alcalifaciens</i> strain BT169                                               | Coastal water         | MH085194          |
| pAB213                | 2683       | <i>Providencia rettgeri</i> strain AB213                                                    | Lettuce               | MH085193          |
| pOA8911               | 2683       | <i>Ochrobactrum anthropi</i>                                                                | --                    | HF913789          |
| pOA8917               | 2683       | <i>Ochrobactrum anthropi</i>                                                                | --                    | HF913788          |
| pOA8912               | 2683       | <i>Ochrobactrum anthropi</i>                                                                | --                    | HF679278          |
| p36852                | 2683       | <i>Proteus vulgaris</i> strain 36852                                                        | Bovine                | MF062093          |
| p22499                | 2683       | <i>Proteus penneri</i> strain 22499                                                         | Goat                  | MF062092          |
| p39190                | 2669       | <i>Proteus mirabilis</i> strain 39190                                                       | Dog                   | MF062091          |
| p36854                | 2669       | <i>Proteus mirabilis</i> strain 36854                                                       | Bovine                | MF062090          |
| p33184                | 2657       | <i>Proteus mirabilis</i> strain 33184                                                       | Dog                   | MF062089          |
| p2007057              | 4270       | <i>Salmonella enterica</i> subsp. <i>enterica</i> serovar <i>Bovismorbificans</i>           | Human infections      | FJ228229          |
| pSE10MM               | 2662       | <i>Morganella morganii</i> strain SE10MM                                                    | Urine clinical sample | KU160530          |
| KVHS-001              | 6887       | <i>Salmonella enterica</i> subsp. <i>enterica</i> serovar <i>Braenderup</i> strain 95.50    | --                    | KJ685894          |
| KVHS-002              | 8127       | <i>Salmonella enterica</i> subsp. <i>enterica</i> serovar <i>Typhimurium</i> strain 14620   | --                    | KJ685893          |
| KVHS-003              | 9384       | <i>Salmonella enterica</i> subsp. <i>enterica</i> serovar <i>Montevideo</i> strain 29722/48 | --                    | KJ685891          |

|             |      |                                                                                               |               |          |
|-------------|------|-----------------------------------------------------------------------------------------------|---------------|----------|
| KVHS-004    | 6227 | <i>Salmonella enterica</i><br>subsp. <i>enterica</i><br>serovar <i>Hadar</i><br>strain 139.67 | --            | KJ685892 |
| pPmZXF      | 2683 | <i>Proteus mirabilis</i><br>strain PmZXF                                                      | Chicken       | KP313759 |
| p1042       | 2682 | <i>Proteus mirabilis</i><br>strain C1042                                                      | Chicken       | KP330456 |
| pMB18       | 5201 | <i>Proteus vulgaris</i><br>strain MB18                                                        | Urine         | KM577619 |
| pEAD1-2     | 2669 | <i>Proteus mirabilis</i><br>strain Q1084                                                      | Urine         | KF498971 |
| pEAD1-1     | 2683 | <i>Proteus vulgaris</i><br>strain Q5169                                                       | Surgery wound | KF498970 |
| pM510       | 2683 | <i>Proteus mirabilis</i>                                                                      | Housefly      | KJ190020 |
| pLRB12-304  | 2658 | <i>Proteus mirabilis</i>                                                                      | --            | KF364957 |
| pRS12-189   | 2656 | <i>Proteus mirabilis</i>                                                                      | --            | KF364956 |
| pRS12-104   | 2683 | <i>Proteus mirabilis</i>                                                                      | --            | KF364955 |
| pRS12-78    | 4286 | <i>Proteus vulgaris</i>                                                                       | --            | KF364954 |
| pRS12-11    | 2683 | <i>Proteus mirabilis</i>                                                                      | --            | KF364953 |
| p3M-2B      | 5903 | <i>Proteus vulgaris</i><br>strain 3M                                                          | Shrimp        | JX514066 |
| pCGH69      | 2683 | <i>Morganella morganii</i><br>strain CGH69                                                    | Urine         | JQ776510 |
| pCGP248     | 2683 | <i>Proteus mirabilis</i><br>strain CGP248                                                     | Dog feces     | JQ776503 |
| pCGF41      | 4268 | <i>Citrobacter freundii</i><br>strain CGF41                                                   | Pork          | JQ776505 |
| pCGB40      | 4269 | <i>Escherichia coli</i><br>strain CGB40                                                       | Pigeon feces  | JQ776504 |
| p831        | 2684 | <i>Morganella morganii</i><br>strain Vr831                                                    | Urine         | JN183061 |
| pT80        | 2687 | <i>Proteus mirabilis</i><br>strain T80                                                        | Urine         | JN183060 |
| pGHS09-09a  | 2683 | <i>Providencia rettgeri</i>                                                                   | --            | HQ834473 |
| pDIJ09-518a | 2683 | <i>Providencia rettgeri</i>                                                                   | --            | HQ834472 |
| pCGP246     | 4270 | <i>Escherichia coli</i><br>strain CGP246                                                      | Dog feces     | JQ776501 |
| pCGP169     | 4270 | <i>Escherichia coli</i><br>strain CGP169                                                      | Dog feces     | JQ776502 |
| pCGH25      | 4270 | <i>Klebsiella pneumoniae</i><br>strain                                                        | Urine         | JQ776509 |

|           |      |                            |                    |             |  |
|-----------|------|----------------------------|--------------------|-------------|--|
|           |      | CGH25                      |                    |             |  |
| pCGP180   | 4270 | <i>Proteus mirabilis</i>   | Canis lupus        | JX982605    |  |
|           |      | strain CGP180              | familiaris feces   |             |  |
| pCGH40    | 4270 | <i>Proteus mirabilis</i>   | Urine              | JX982606    |  |
|           |      | strain CGH40               |                    |             |  |
| p39224    | 2683 | <i>Proteus mirabilis</i>   | Dog                | MF062094    |  |
|           |      | strain 39224               |                    |             |  |
| pIB_COL3M | 2655 | <i>Proteus mirabilis</i>   | Urine catheter     | NZ_CP045539 |  |
|           |      | strain CRE14IB             |                    |             |  |
| pOA8916   | 1961 | <i>Ochrobactrum</i>        | --                 | HF913787    |  |
|           |      | <i>anthropi</i>            |                    |             |  |
| pQnrD2    | 4268 | <i>Salmonella enterica</i> | Homo sapiens feces | KJ158441    |  |
|           |      | subsp. <i>enterica</i>     |                    |             |  |
|           |      | serovar <i>Hadar</i>       |                    |             |  |
|           |      | strain N08-2312            |                    |             |  |
| Unnamed   | 2683 | <i>Salmonella enterica</i> | Swine              | MK191843    |  |
|           |      | subsp. <i>enterica</i>     |                    |             |  |
|           |      | serovar <i>Heidelberg</i>  |                    |             |  |
|           |      | strain 69                  |                    |             |  |
| pM60      | 2683 | <i>Morganella</i>          | Urine              | KF813021    |  |
|           |      | <i>morganii</i>            |                    |             |  |

<sup>a</sup> The sequences in the GenBank entries for KVHS-001, KVHS-002, KVHS-003 and KVHS-004 are linear and these entries do not state that they are complete plasmids, which appear to be fragments.

<sup>b</sup> "--" means the source remains unknown or unreported.
