# Supplementary material for: Functional Identification and Evolutionary Analysis of Two Novel Plasmids Mediating Quinolone Resistance in Proteus vulgaris
Source: MDPI journal article supplement (doi:10.3390/microorganisms8071074), 2020-07-18
Supplement: s1 [file s1]

**Table S1. Primers used in this study**

| Primer <sup>a</sup> | Sequence (5'-3') <sup>b</sup>        | Purpose                                                                     |
|---------------------|--------------------------------------|-----------------------------------------------------------------------------|
| 2A*-F               | <u>GGATCC</u> AAATAGTGCCTCTGGGCAAA   | Amplification primers of p3M-2A*                                            |
| 2A*-R               | <u>GGATCC</u> ACGGGCGAGTTAGTTAGCAA   |                                                                             |
| 2B*-F               | <u>GGATCC</u> GATGAATCAATTTTAGCTAGAG | Amplification primers of p3M-2B*                                            |
| 2B*-R               | <u>GGATCC</u> AATCCCTTTTATGTAAACGG   |                                                                             |
| q3M-16S-F           | TCGCCTAGGTGAGCCTTTAC                 | Primers of reference gene 16S for qRT-PCR in P3M and corresponding strains  |
| q3M-16S-R           | CGAGCGGTAACAGGAGAAAG                 |                                                                             |
| qDH-16S-F           | CGGACGGGTGAGTAATGTCT                 | Primers of reference gene 16S for qRT-PCR in DH5a and corresponding strains |
| qDH-16S-R           | TCAGACCAGCTAGGGATCGT                 |                                                                             |
| q- <i>qnrD</i> -F   | GCTCAAGGAGCTGATTTTCG                 | Primers of <i>qnrD</i> for qRT-PCR                                          |
| q- <i>qnrD</i> -R   | ACGATGAAAAC TCCCCACAA                |                                                                             |
| YZ-2A-F             | GGTTGCATCGCATTTTACA                  | Validation primers of p3M-2A and p3M-2A*                                    |
| YZ-2A-R             | AGCTTTCGACACCTCCAAGA                 |                                                                             |
| YZ-2B-F             | CAGTTGCCCAGCTATGTTGA                 | Validation primers of p3M-2B and p3M-2B*                                    |
| YZ-2B-R             | TCTGTCACTGCATCCAAACC                 |                                                                             |

<sup>a</sup> F, forward primer; R, reverse primer.

<sup>b</sup> Restriction sites are underlined.
